# Supplementary material
Source: publisher figshare collection journal article supplement (https://diabetesjournals.figshare.com/ndownloader/files/36344208)
Supplement: Supplementary file 1 [file 36344208]

## Table of Contents

|                                                                                                                                                                           |    |
|---------------------------------------------------------------------------------------------------------------------------------------------------------------------------|----|
| Supplementary Table 1. Outcome definitions .....                                                                                                                          | 2  |
| Supplementary Figure 1. Study Flow Chart for Comparison Between Users of Dipeptidyl Peptidase-4 Inhibitors and Sodium Glucose Cotransporter-2 Inhibitors.....             | 6  |
| Supplementary Figure 2. Propensity Score Distribution for Users of Dipeptidyl Peptidase-4 Inhibitors and Sodium Glucose Cotransporter-2 Inhibitors.....                   | 6  |
| Supplementary Figure 3. Forest Plot Depicting Secondary Analyses Comparing Dipeptidyl Peptidase-4 Inhibitors and Sodium Glucose Cotransporter-2 Inhibitors.....           | 8  |
| Supplementary Figure 4. Forest Plot Depicting Sensitivity Analyses Comparing Dipeptidyl Peptidase-4 Inhibitors and Sodium Glucose Cotransporter-2 Inhibitors.....         | 9  |
| Supplementary Figure 5. Study Flow Chart for Comparison Between Users of Glucagon-like Peptide-1 Receptor Agonists and Sodium Glucose Cotransporter-2 Inhibitors.....     | 10 |
| Supplementary Figure 6. Propensity Score Distribution for Users of Glucagon-like Peptide-1 Receptor Agonist and Sodium Glucose Cotransporter-2 Inhibitors.....            | 11 |
| Supplementary Figure 7. Forest Plot Depicting Secondary Analyses Comparing Glucagon-like Peptide-1 Receptor Agonist and Sodium Glucose Cotransporter-2 Inhibitors .....   | 12 |
| Supplementary Figure 8. Forest Plot Depicting Sensitivity Analyses Comparing Glucagon-like Peptide-1 Receptor Agonist and Sodium Glucose Cotransporter-2 Inhibitors ..... | 13 |
| Supplementary Table 2. Hazard Ratios for Neuropathy Comparing DPP-4 Inhibitors and GLP-1 RAs with SGLT-2 Inhibitors .....                                                 | 14 |

| Supplementary Table 1. Outcome definitions |                                                          |
|--------------------------------------------|----------------------------------------------------------|
| Read codes                                 |                                                          |
| Code                                       | Term                                                     |
| J600.00                                    | Acute necrosis of liver                                  |
| J60..00                                    | Acute and subacute liver necrosis                        |
| J600000                                    | Acute hepatic failure                                    |
| J600011                                    | Acute liver failure                                      |
| J600100                                    | Acute hepatitis - noninfective                           |
| J600200                                    | Acute yellow atrophy                                     |
| J600z00                                    | Acute necrosis of liver NOS                              |
| J601.00                                    | Subacute necrosis of liver                               |
| J601000                                    | Subacute hepatic failure                                 |
| J601100                                    | Subacute hepatitis - noninfective                        |
| J601200                                    | Subacute yellow atrophy                                  |
| J601z00                                    | Subacute necrosis of liver NOS                           |
| J60z.00                                    | Acute and subacute liver necrosis NOS                    |
| J622.00                                    | Hepatic coma                                             |
| J622.11                                    | Encephalopathy - hepatic                                 |
| J625.00                                    | [X] Hepatic failure                                      |
| J625.11                                    | [X] Liver failure                                        |
| J62y.11                                    | Hepatic failure NOS                                      |
| J62y.12                                    | Liver failure NOS                                        |
| J62y.13                                    | Hepatic failure                                          |
| J633.00                                    | Hepatitis unspecified                                    |
| J633000                                    | Toxic hepatitis                                          |
| J633z00                                    | Hepatitis unspecified NOS                                |
| J635500                                    | Toxic liver disease with chronic active hepatitis        |
| J635300                                    | Toxic liver disease with chronic persistent hepatitis    |
| J635600                                    | Toxic liver disease with fibrosis and cirrhosis of liver |
| Jyu7600                                    | [X]Toxic liver disease, unspecified                      |
| J635.00                                    | Toxic liver disease                                      |
| J635000                                    | Toxic liver disease with cholestasis                     |
| J635100                                    | Toxic liver disease with hepatic necrosis                |
| J635X00                                    | Toxic liver disease, unspecified                         |
| J635200                                    | Toxic liver disease with acute hepatitis                 |
| J635400                                    | Toxic liver disease with chronic lobular hepatitis       |
| J636.00                                    | Central haemorrhagic necrosis of liver                   |
| J63y100                                    | Nonspecific reactive hepatitis                           |
| D307000                                    | Deficiency of coagulation factor due to liver disease    |
| J624.00                                    | Hepatorenal syndrome                                     |

| SP14200         | Hepatic failure as a complication of care                |
|-----------------|----------------------------------------------------------|
| SP14300         | Hepatorenal syndrome as a complication of care           |
| J635700         | Acute hepatic failure due to drugs                       |
| J63B.00         | Autoimmune hepatitis                                     |
| SNOMED-CT codes |                                                          |
| Code            | Term                                                     |
| 197355005       | Toxic liver disease with cholestasis                     |
| 197358007       | Toxic liver disease with acute hepatitis                 |
| 197359004       | Toxic liver disease with chronic persistent hepatitis    |
| 197354009       | [X]Toxic liver disease with other disorders of liver     |
| 197354009       | Toxic liver disease, unspecified                         |
| 197361008       | Toxic liver disease with chronic active hepatitis        |
| 197354009       | [X]Toxic liver disease, unspecified                      |
| 197356006       | Toxic liver disease with hepatic necrosis                |
| 197354009       | Toxic liver disease                                      |
| 197360009       | Toxic liver disease with chronic lobular hepatitis       |
| 197362001       | Toxic liver disease with fibrosis and cirrhosis of liver |
| 197268000       | Acute and subacute liver necrosis                        |
| 197269008       | Acute necrosis of liver                                  |
| 197270009       | Acute liver failure                                      |
| 197274000       | Subacute necrosis of liver                               |
| 197268000       | Acute/subac. necrosis of liver                           |
| 197270009       | ALF - Acute liver failure                                |
| 197276003       | Subacute yellow atrophy of liver                         |
| 197269008       | Acute yellow atrophy of liver                            |
| 235856003       | Subacute necrosis of liver NOS                           |
| 197269008       | Acute necrosis of liver NOS                              |
| 197268000       | Acute and subacute liver necrosis NOS                    |
| 197276003       | Subacute yellow atrophy                                  |
| 197269008       | Acute yellow atrophy                                     |
| 197275004       | Subacute hepatic failure                                 |
| 72445008        | Subacute hepatitis - noninfective                        |
| 197271008       | Acute hepatitis - noninfective                           |
| 197271008       | Acute noninfectious hepatitis                            |
| 72445008        | Subacute noninfective hepatitis                          |
| 72445008        | Subacute non-infective hepatitis                         |
| 197270009       | Acute hepatic failure                                    |
| 197274000       | Subacute hepatic necrosis                                |
| 37871000        | Acute hepatitis                                          |
| 413438002       | Acute hepatic failure due to drugs                       |

| 72836002                                                                            | Hepatic coma                                                 |
|-------------------------------------------------------------------------------------|--------------------------------------------------------------|
| 13920009                                                                            | Encephalopathy - hepatic                                     |
| 59927004                                                                            | Hepatic failure                                              |
| 213230009                                                                           | Hepatic failure as a complication of care                    |
| 59927004                                                                            | [X] Hepatic failure                                          |
| 59927004                                                                            | Hepatic failure NOS                                          |
| 213230009                                                                           | Liver failure as a complication of care                      |
| 906001000006101                                                                     | [RFC] Liver failure                                          |
| 59927004                                                                            | Liver failure NOS                                            |
| 59927004                                                                            | [X] Liver failure                                            |
| 773411000000107                                                                     | Compensation for liver failure                               |
| 773411000000107                                                                     | Other specified compensation for liver failure               |
| 59927004                                                                            | Liver function failure                                       |
| 773411000000107                                                                     | Compensation for liver failure NOS                           |
| 128241005                                                                           | Hepatitis unspecified                                        |
| 128241005                                                                           | Hepatitis unspecified NOS                                    |
| 197364000                                                                           | Central haemorrhagic necrosis of liver                       |
| 235858002                                                                           | Nonspecific reactive hepatitis                               |
| 408335007                                                                           | Autoimmune hepatitis                                         |
| 191296000                                                                           | Deficiency of coagulation factor due to liver disease        |
| 213231008                                                                           | Hepatorenal syndrome as a complication of care               |
| 51292008                                                                            | HRF - Hepatorenal failure                                    |
| 51292008                                                                            | Hepatorenal failure                                          |
| 51292008                                                                            | Hepatorenal syndrome                                         |
| 88469006                                                                            | Cerebrohepatorenal syndrome                                  |
| ICD-10 code-based definition                                                        |                                                              |
| Code                                                                                | Term                                                         |
| K71.0                                                                               | Toxic liver disease with cholestasis                         |
| K71.1                                                                               | Toxic liver disease with hepatic necrosis                    |
| K71.2                                                                               | Toxic liver disease with acute hepatitis                     |
|                                                                                     | Toxic liver disease with hepatitis, not elsewhere classified |
| K71.6                                                                               |                                                              |
| K71.9                                                                               | Toxic liver disease, unspecified                             |
| K72.0                                                                               | Acute and subacute hepatic failure                           |
| K72.9                                                                               | Hepatic failure, unspecified                                 |
| K75.9                                                                               | Inflammatory liver disease, unspecified                      |
| K76.2                                                                               | Central hemorrhagic necrosis of liver                        |
| Enzyme-based definition                                                             |                                                              |
| Alanine or aspartate transaminase increase to $\geq 5$ -fold the upper normal limit |                                                              |
| OR                                                                                  |                                                              |
| ALP increases to $\geq 2$ -fold the upper normal limit                              |                                                              |
| OR                                                                                  |                                                              |

---

Total bilirubin concentration increases  $>2$ -fold the upper normal limit associated with  
Alanine or aspartate transaminase increases to  $\geq 3$ -fold the upper normal limit.

---

Supplementary Figure 1. Study Flow Chart for Comparison Between Users of Dipeptidyl Peptidase-4 Inhibitors and Sodium Glucose Cotransporter-2 Inhibitors

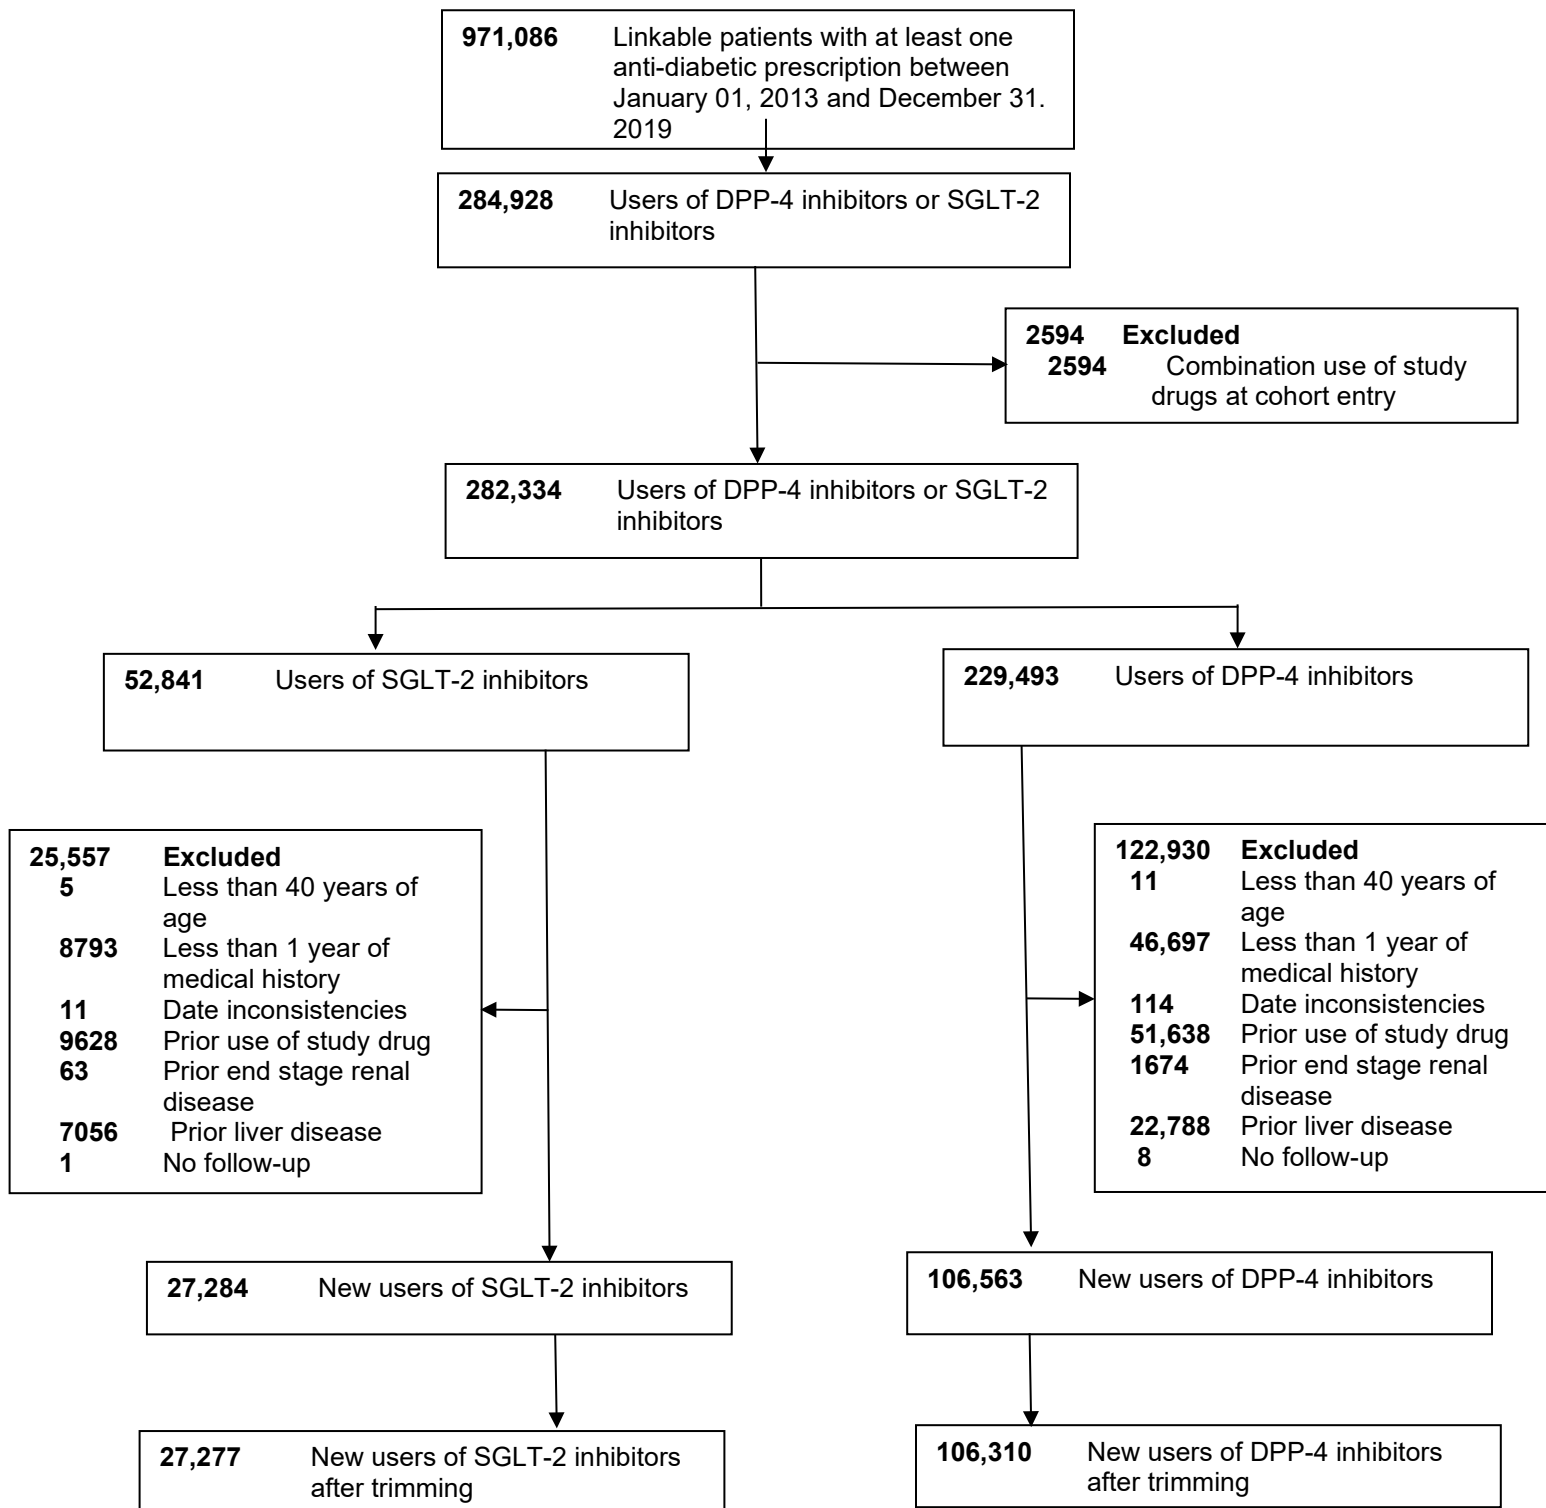

Supplementary Figure 2. Propensity Score Distribution for Users of Dipeptidyl Peptidase-4 Inhibitors and Sodium Glucose Cotransporter-2 Inhibitors

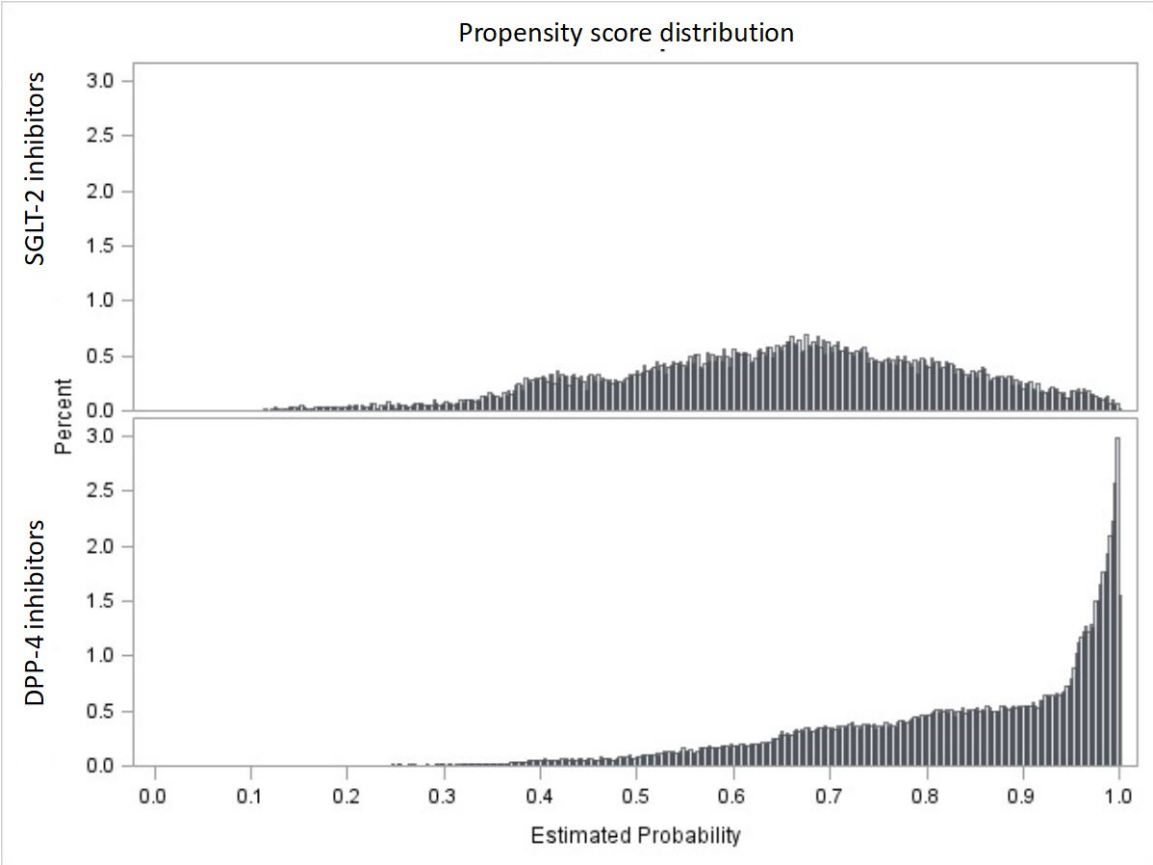

Supplementary Figure 3. Forest Plot Depicting Secondary Analyses Comparing Dipeptidyl Peptidase-4 Inhibitors and Sodium Glucose Cotransporter-2 Inhibitors

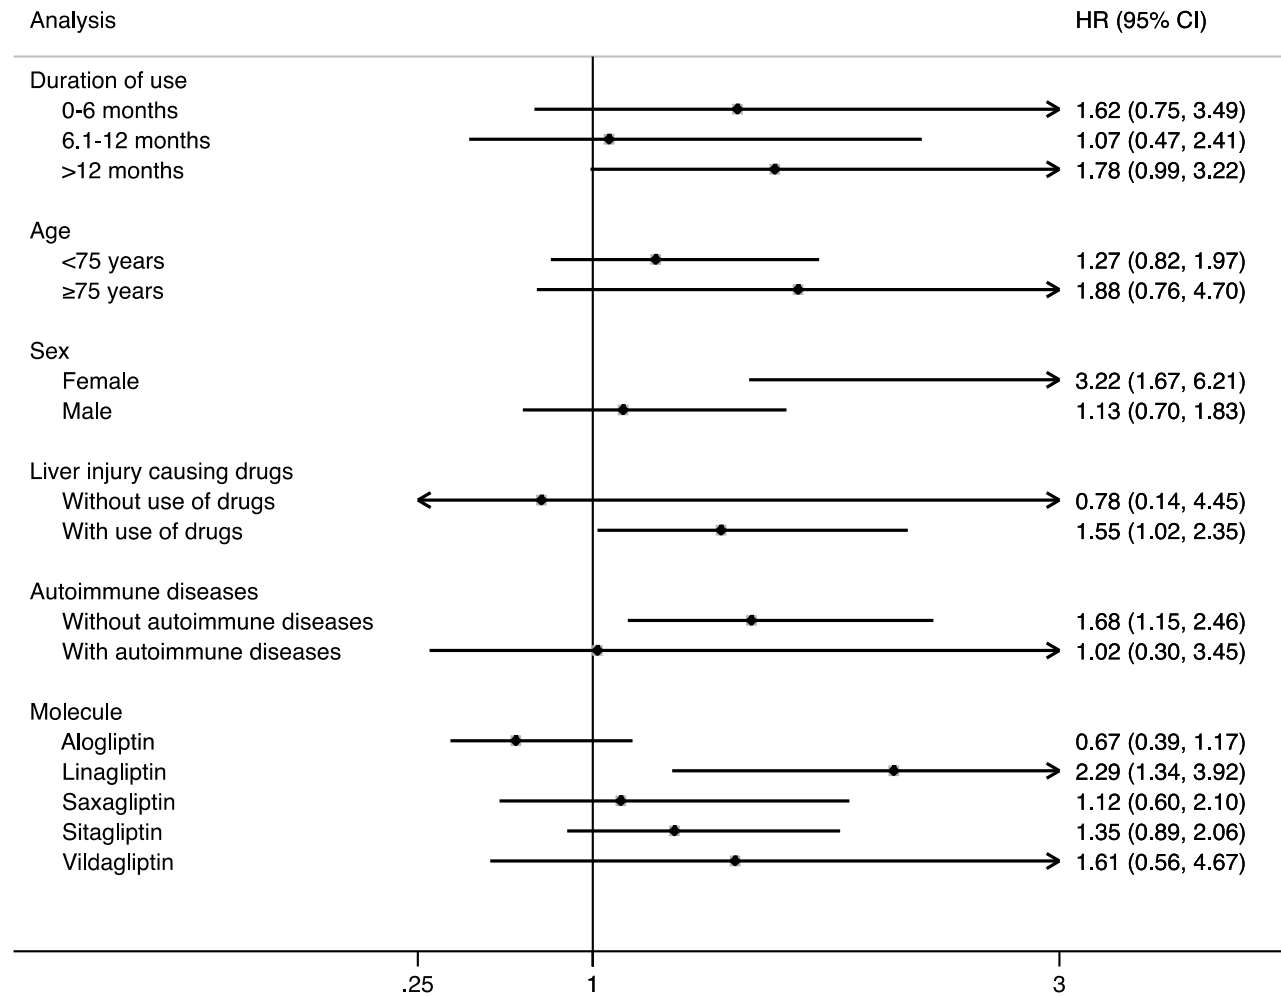



Supplementary Figure 4. Forest Plot Depicting Sensitivity Analyses Comparing Dipeptidyl Peptidase-4 Inhibitors and Sodium Glucose Cotransporter-2 Inhibitors

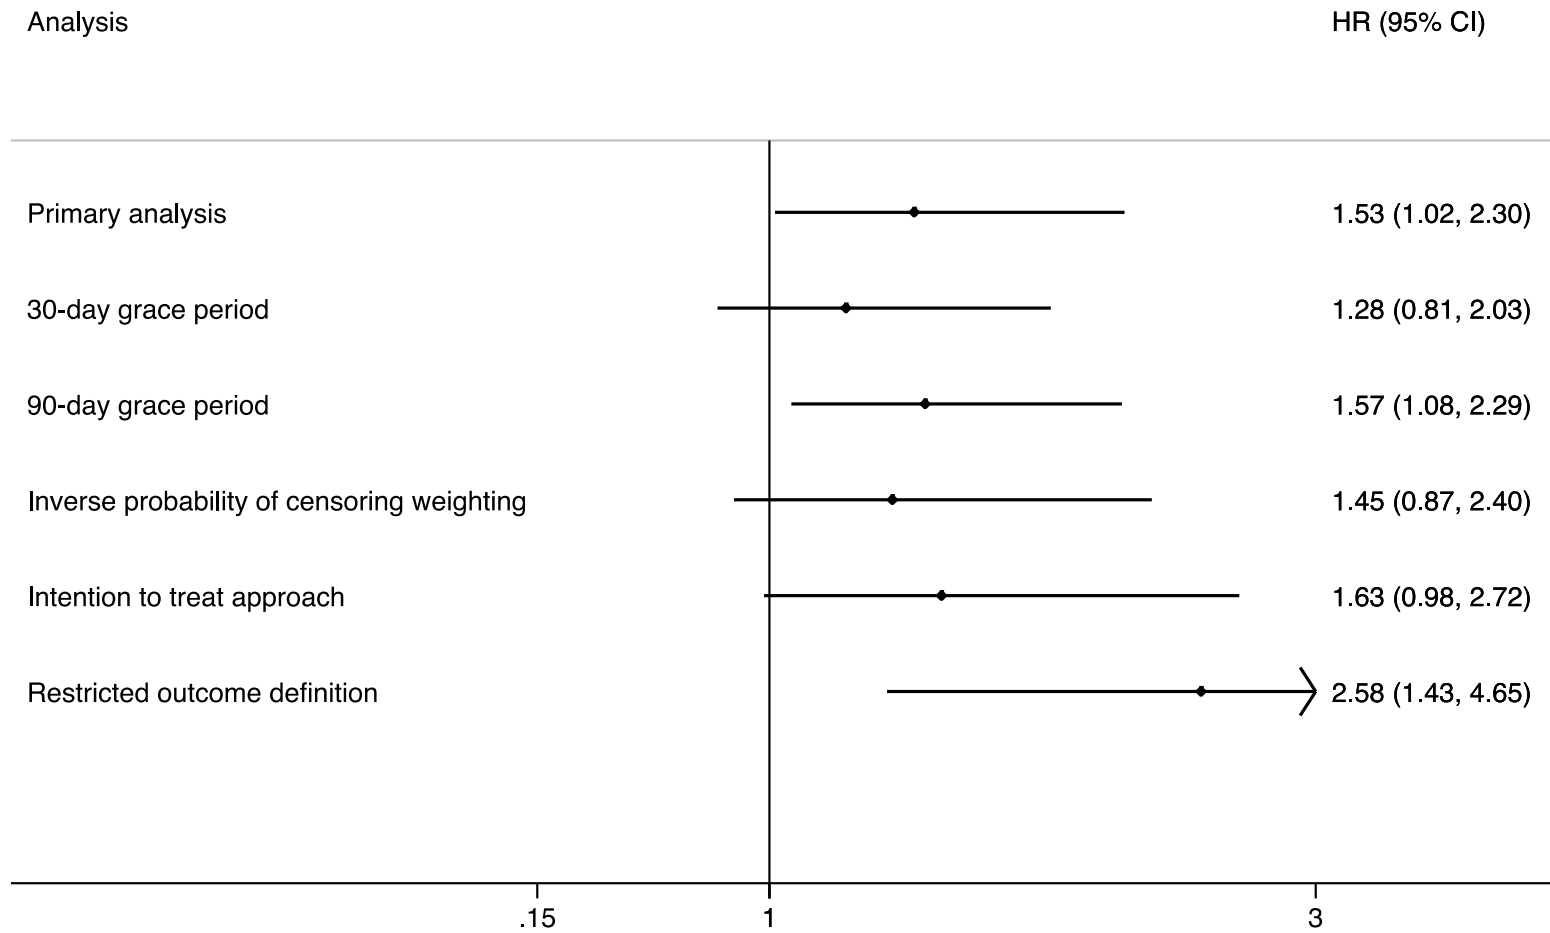

Supplementary Figure 5. Study Flow Chart for Comparison Between Users of Glucagon-like Peptide-1 Receptor Agonists and Sodium Glucose Cotransporter-2 Inhibitors

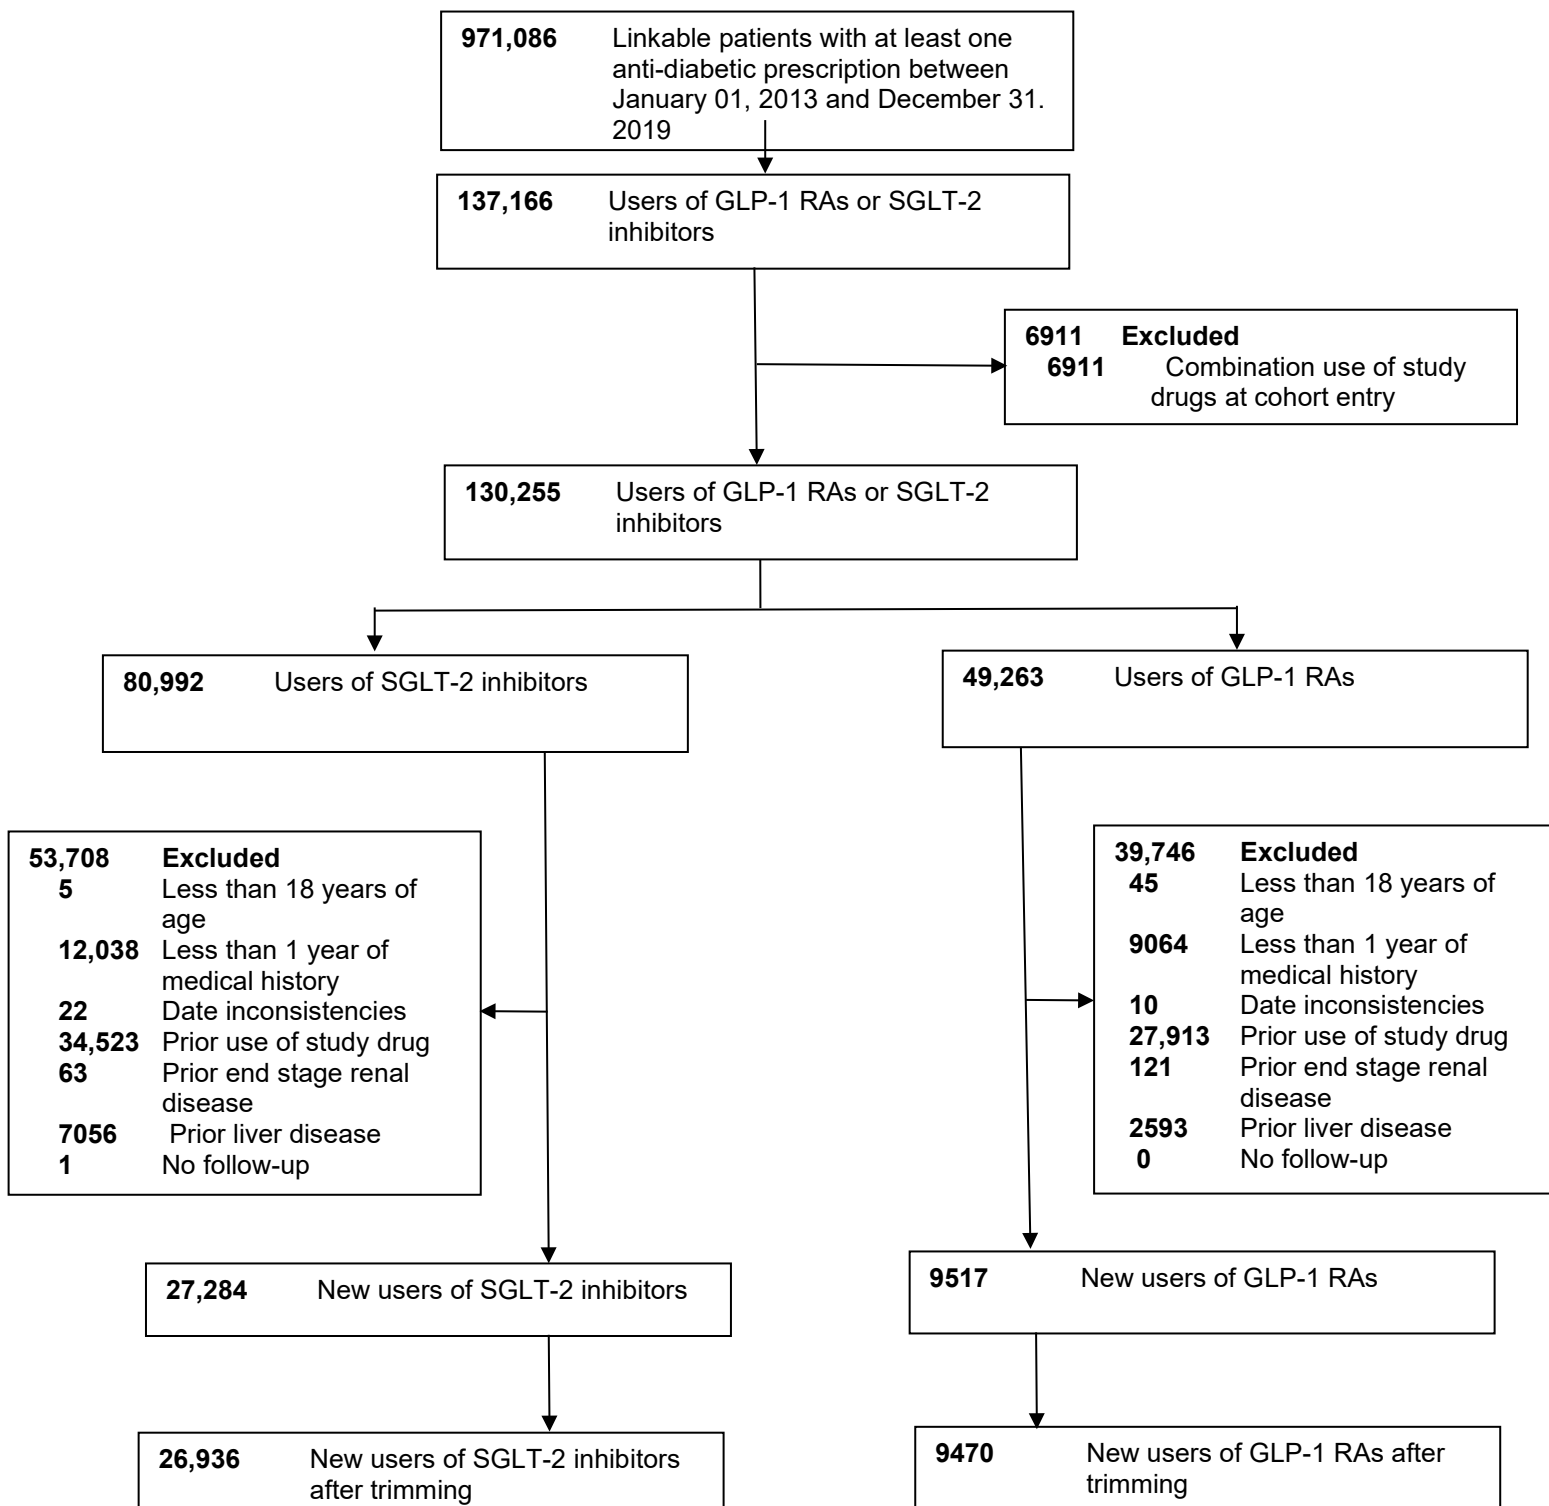

Supplementary Figure 6. Propensity Score Distribution for Users of Glucagon-like Peptide-1 Receptor Agonist and Sodium Glucose Cotransporter-2 Inhibitors

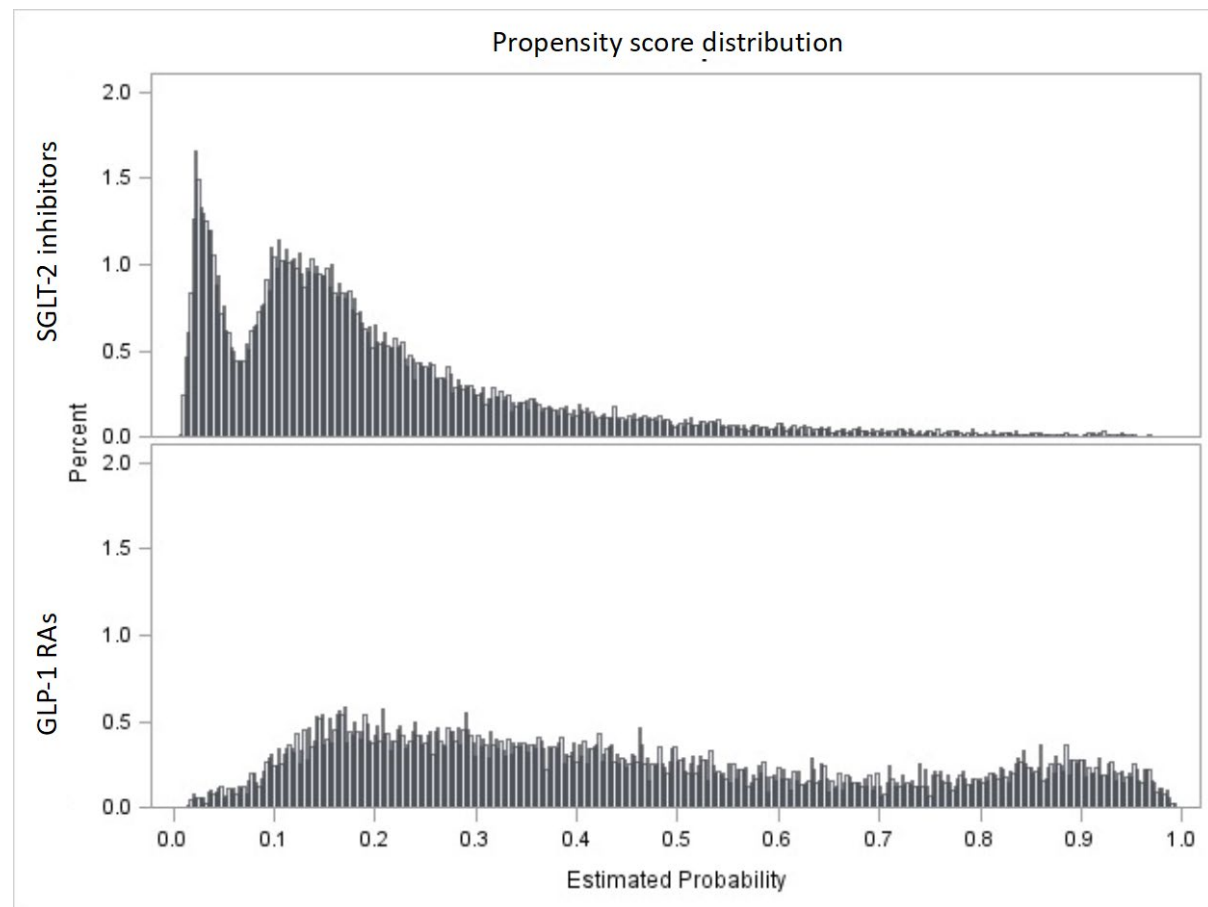

Supplementary Figure 7. Forest Plot Depicting Secondary Analyses Comparing Glucagon-like Peptide-1 Receptor Agonist and Sodium Glucose Cotransporter-2 Inhibitors

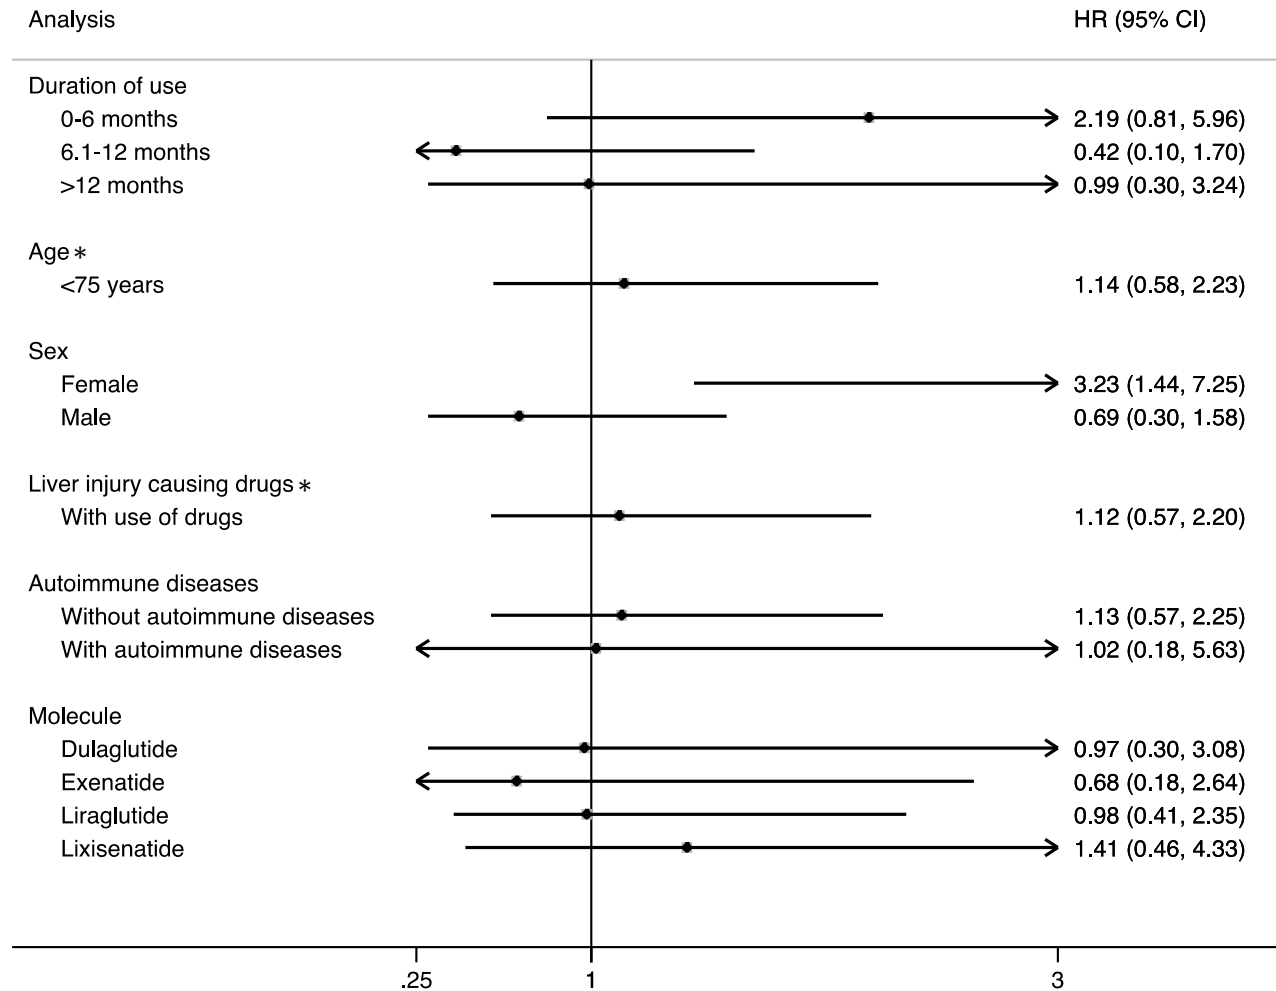

\* Categories of age  $\geq 75$  years and without use of liver injury causing drugs without any event

Supplementary Figure 8. Forest Plot Depicting Sensitivity Analyses Comparing Glucagon-like Peptide-1 Receptor Agonist and Sodium Glucose Cotransporter-2 Inhibitors

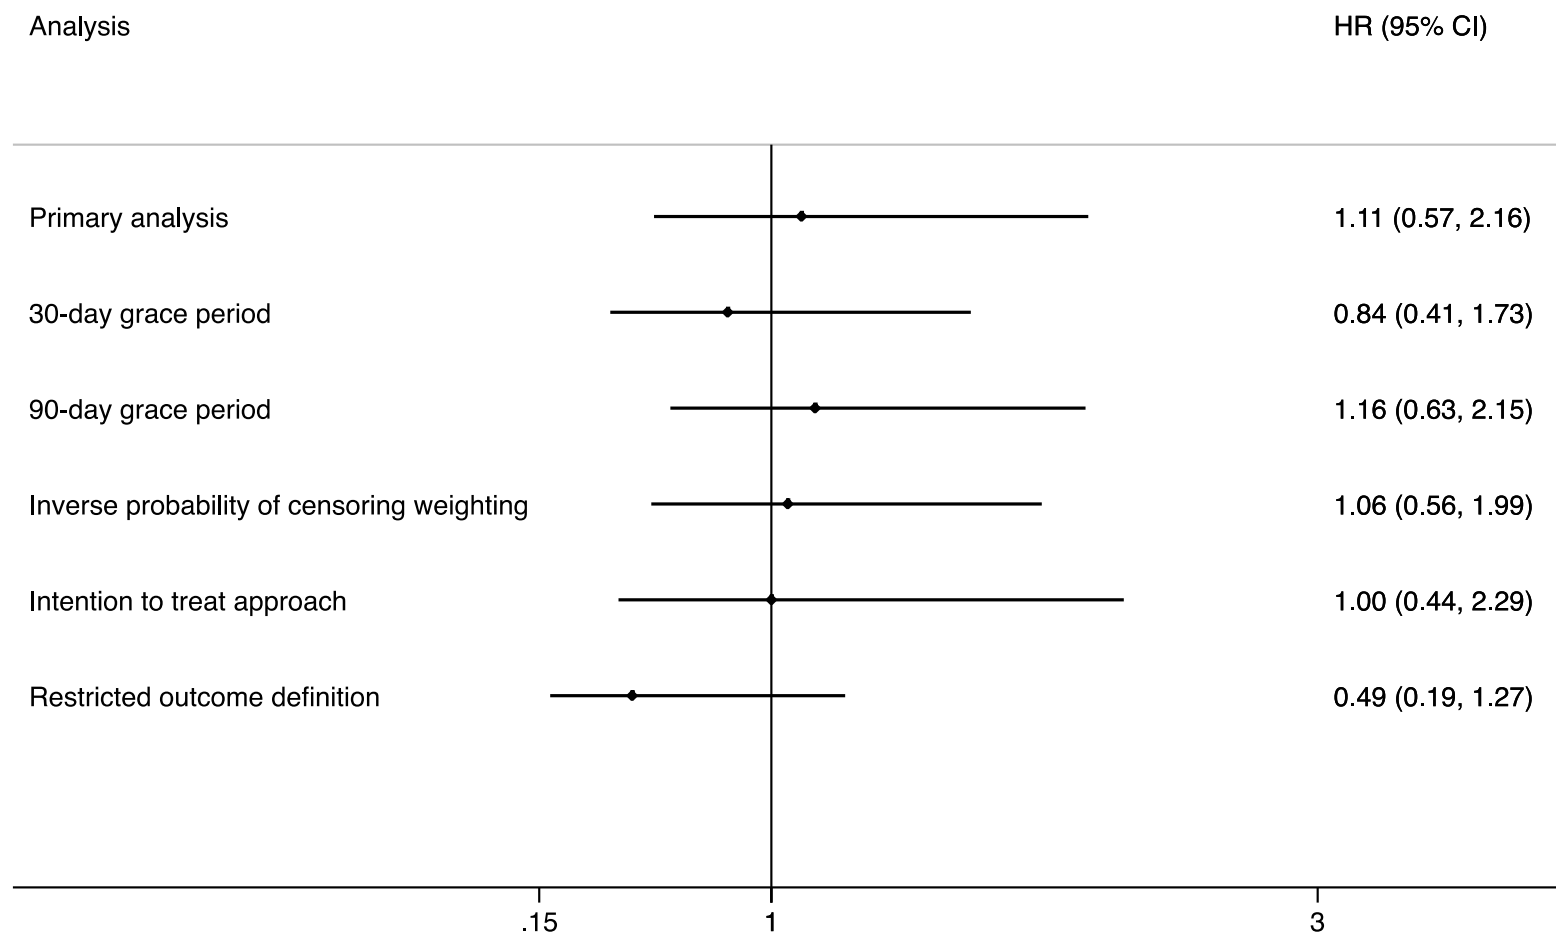

Supplementary Table 2. Hazard Ratios for Neuropathy Comparing DPP-4 Inhibitors and GLP-1 RAs with SGLT-2 Inhibitors

| Exposure                               | Patients | Events | Person-years | Incidence rate (95% CI) * <sup>†</sup> | Crude HR | Weighted HR (95% CI) <sup>†</sup> |
|----------------------------------------|----------|--------|--------------|----------------------------------------|----------|-----------------------------------|
| DPP-4 Inhibitors vs. SGLT-2 Inhibitors |          |        |              |                                        |          |                                   |
| SGLT-2 inhibitors                      | 28,285   | 398    | 35,490       | 13.6 (12.5-14.8)                       | 1.00     | 1.00 [Reference]                  |
| DPP-4 inhibitors                       | 98,379   | 2030   | 162,228      | 12.5 (12.0-13.1)                       | 1.15     | 0.93 (0.85-1.02)                  |
| GLP-1 RAs vs. SGLT-2 Inhibitors        |          |        |              |                                        |          |                                   |
| SGLT-2 inhibitors                      | 28,165   | 397    | 35,378       | 16.6 (15.4-17.9)                       | 1.00     | 1.00 [Reference]                  |
| GLP-1 RAs                              | 8954     | 260    | 13,812       | 18.8 (16.6-21.3)                       | 1.70     | 1.13 (0.98-1.30)                  |

Abbreviations: CI, confidence interval; DPP-4, dipeptidyl peptidase 4; GLP-1 RAs, glucagon-like peptide 1 receptor agonists; HR, hazard ratio; SGLT-2, sodium-glucose cotransporter-2.

\* Per 1000 person-years.

<sup>†</sup> Weighted using propensity score fine stratification.
